# Supplementary figures and images for: Traditional-medical knowledge and perception of pangolins (Manis sps) among the Awori people, Southwestern Nigeria
Source: Springer Nature journal article supplement (doi:10.1186/1746-4269-7-25), 2011-09-01

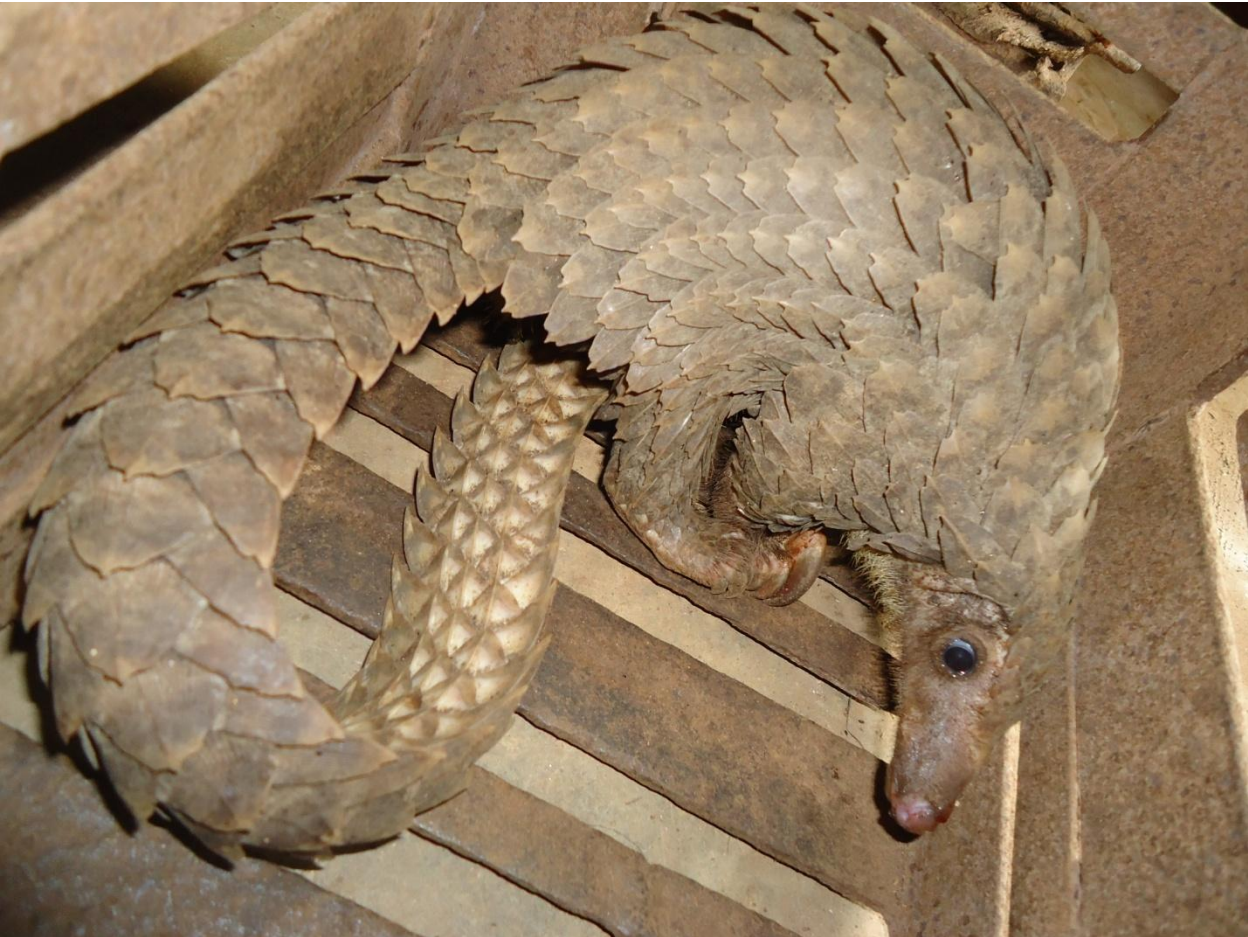

Supplement: 13002_2011_234_MOESM2_ESM.pdf [file 13002_2011_234_MOESM2_ESM.pdf]
